# Supplementary material for: Robust Denaturation of Villin Headpiece by MoS2 Nanosheet: Potential Molecular Origin of the Nanotoxicity
Source: PubMed Central journal article supplement (PMC4911589; doi:10.1038/srep28252), 2016-06-17
Supplement: srep28252-s1.pdf [file srep28252-s1.pdf]

# Robust Denaturation of Villin Headpiece by MoS<sub>2</sub> Nanosheet:

## Potential Molecular Origin of the Nanotoxicity

Zonglin Gu<sup>1,‡</sup>, Zaixing Yang<sup>1,‡</sup>, Seung-gu Kang<sup>2</sup>, Jerry R. Yang<sup>2</sup>, Judong

Luo<sup>\*,3,1</sup>, Ruhong Zhou<sup>\*1,2,4</sup>

1. School for Radiological and Interdisciplinary Sciences (RAD-X) and Collaborative Innovation Center of Radiation Medicine of Jiangsu Higher Education Institutions, Soochow University, Suzhou, China, 215123

2. Computational Biological Center, IBM Thomas J. Watson Research Center, Yorktown Heights, NY 10598, USA

3. Department of Radiotherapy, Changzhou Tumor Hospital, Soochow University, Changzhou, 213001, China

4. Department of Chemistry, Columbia University, New York, NY 10027, USA

‡These authors contribute equally

\*Corresponding authors: (J.D.L) Judongluo@163.com; (R.H.Z.) ruhong@us.ibm.com

Table S1. Force field parameters used in the simulation. The values are in units of eV and Å for energy and distance, respectively.

| Bond coefficients | $r_0$ | $k$    |  |
|-------------------|-------|--------|--|
| Mo-S              | 2.41  | 4.3213 |  |

  

| Angle coefficients | $\theta_0$ | $k$    |  |
|--------------------|------------|--------|--|
| Mo-S-Mo            | 81.67      | 3.4297 |  |
| S-Mo-S             | 81.78      | 2.7227 |  |

  

| Non-bonded coefficients | $\sigma$ | $\varepsilon$ | charge |
|-------------------------|----------|---------------|--------|
| Mo                      | 2.5510   | 0.8382        | 0.76   |
| S                       | 3.3695   | 0.0606        | -0.38  |

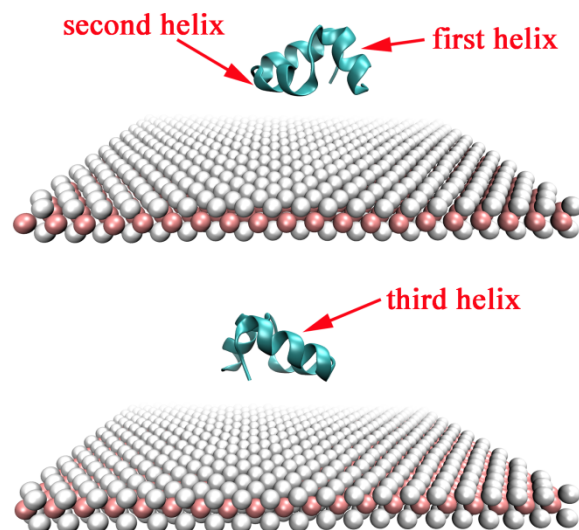

Figure S1. Two side views of HP35/MoS<sub>2</sub> complex.

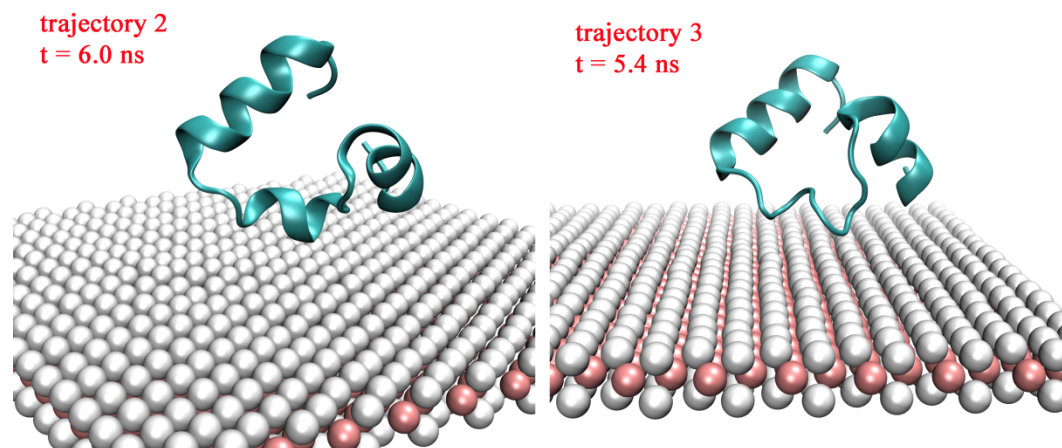

Figure S2. Initial contacting configurations of HP35 and MoS<sub>2</sub> nanosheet in the other two trajectories.

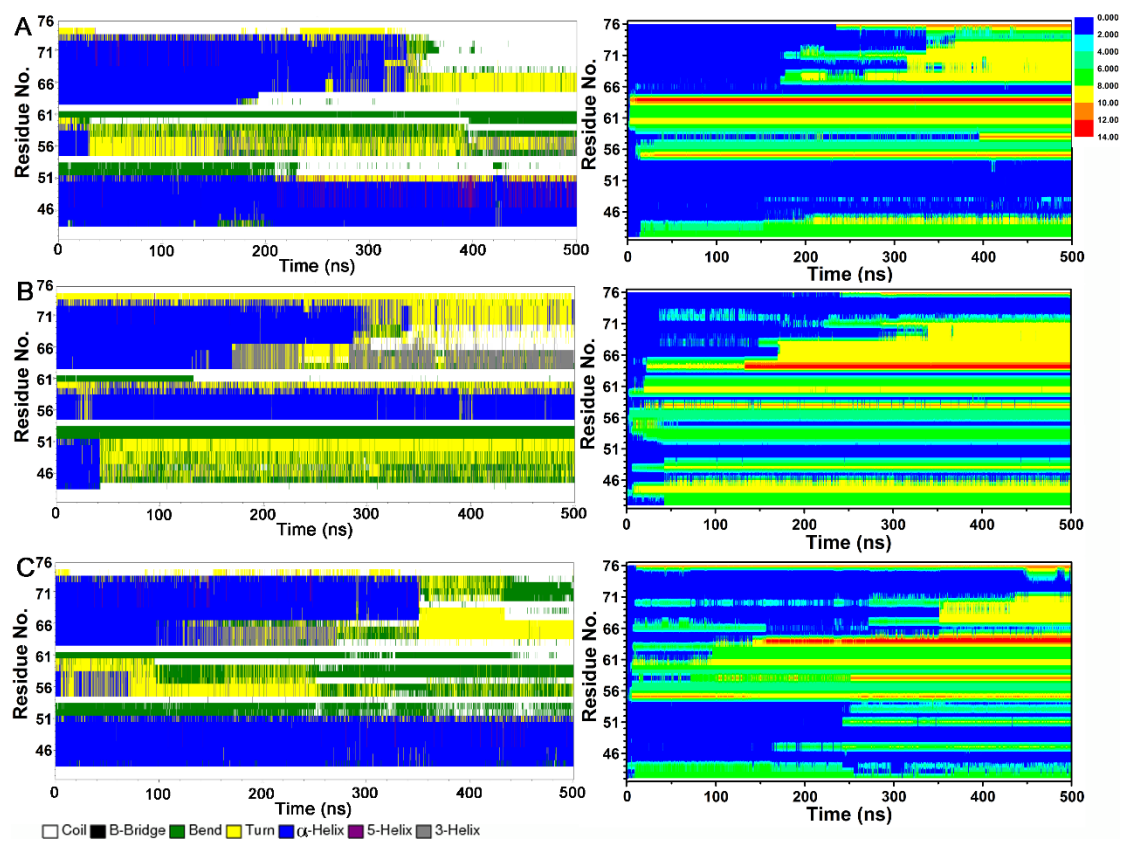

Figure. S3. Time evolution of the secondary structure of HP35 (the first column) and the heavy atom contact number between protein and MoS<sub>2</sub> nano-sheet (the second column) for all three trajectories, A for run-1, B for run-2, and C for run-3.

Table S2: Relative populations of hydrophobic, aromatic and basic residues in every helix.

|              | hydrophobic | aromatic | basic |
|--------------|-------------|----------|-------|
| First helix  | 30.0%       | 20.0%    | 10.0% |
| Second helix | 42.9%       | 14.3%    | 14.3% |
| Third helix  | 23.1%       | 7.7%     | 38.5% |

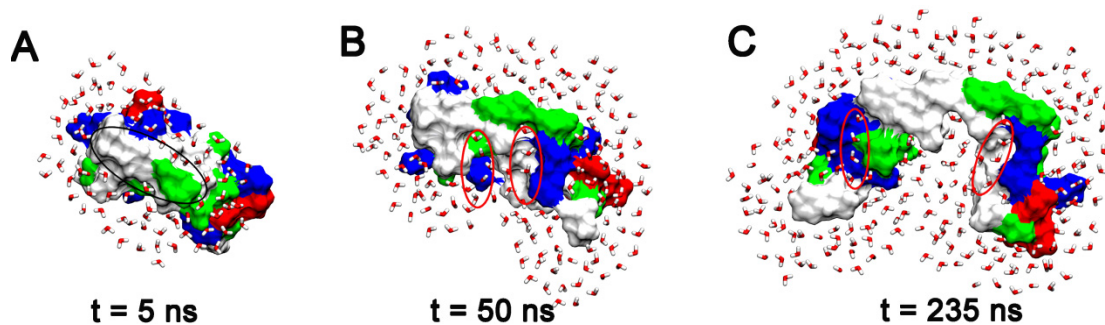

Figure S4. Representative trajectory snapshots to show the water dynamics during the adsorption of HP35 onto the surface of MoS<sub>2</sub> nanosheet. These important intermediate configurations are drawn from the bottom view (from the MoS<sub>2</sub>) and hide the MoS<sub>2</sub> nanosheet. The HP35's surface is colored in terms of the residue sidechain's hydrophobicity, with acidic, basic, polar and nonpolar colored with red, blue, green and white, respectively. The black circle filters out the drying zone and red circles indicate the key wetting positions in which waters emerge as lubricant.
